# Supplementary material
Source: PubMed Central journal article supplement (PMC9691547)
Supplement: NIHMS1840554-supplement-Supplemental_Publication_Material_2.pdf [file NIHMS1840554-supplement-Supplemental_Publication_Material_2.pdf]

1 **Supplemental Material**

2 ***Defective Desmosomal Adhesion Causes Arrhythmogenic Cardiomyopathy by***  
3 ***involving an Integrin- $\alpha$ V $\beta$ 6/TGF- $\beta$  Signaling Cascade***

4 Camilla Schinner MD, Lifen Xu PhD, Henriette Franz PhD, Aude Zimmermann M.sc.,  
5 Marie-Therès Wanuske M.sc., Maitreyi Rathod PhD, Pauline Hanns PhD, Florian Geier  
6 PhD, Pawel Pelczar PhD, Yan Liang PhD, Vera Lorenz M.Sc., Chiara Stüdle PhD,  
7 Piotr I Maly PhD, Silke Kaufenstein PhD, Britt Maria Beckmann MD, Farah Sheikh PhD,  
8 Gabriela M Kuster MD, Volker Spindler MD

9 **1. Detailed Methods**

10 ***DSG2-W2A mouse model***

11 All mouse experiments were carried out according to the protocol approved by the  
 12 Cantonal Veterinary Office of Basel-Stadt (License number 2973\_32878 and  
 13 3070\_32419). All mice were housed under specific pathogen-free conditions with  
 14 standard chow and bedding with 12 hours day/night cycle according to institutional  
 15 guidelines. Animals of both sexes were applied without bias. For inhibitor treatments,  
 16 all mice were age- and sex-matched and randomly allocated to treatment or control  
 17 group.

18 The Dsg2-W>A allele was obtained by Cas9/CRISPR embryo electroporation. The  
 19 Cas9/CRISPR target sequence `tggttcgtcaaaagagggcc(tgg)` (PAM sequence in  
 20 brackets is also the TGG-Trp codon) spanning the mutation site was selected with the  
 21 help of CRISPOR software (<http://crispor.tefor.net/>)<sup>42</sup>. ssDNA oligonucleotide  
 22 `5'gtgataactcaaggtaattgtattaacaggtcttcagccc`  
 23 `aagaaatgaaggcaaaccggtccctaagcacactcacttggttcgtcaaaagagggcagctatcactgcccctgtgg`  
 24 `ctctgcgggagggcgaagacctgtccagaaagaacccgattgccaaggttagcagctacagaagaatgtggcgag`  
 25 `ggtgttggc3'` (GCT – Ala codon in bold underlined) was designed to insert the W>A  
 26 mutation into the Cas9-generated DSB by homologous recombination and at the same  
 27 time mutate the TGG PAM sequence to GCT. C57BL/6J female mice underwent  
 28 ovulation induction by i.p. injection of 5 IU equine chorionic gonadotrophin (PMSG;  
 29 Folligon, InterVet, Vienna, Austria), followed by i.p. injection of 5 IU human chorionic  
 30 gonadotropin (Pregnyl, Essex Chemie, Lucerne, Switzerland) 48 hours later. For the  
 31 recovery of embryos, C57BL/6J females were mated with males of the same strain  
 32 immediately after the administration of human chorionic gonadotropin. Embryos were  
 33 collected from oviducts 24 hours after the human chorionic gonadotropin injection, and  
 34 were then freed from any remaining cumulus cells by a 1–2 min treatment of 0.1 %

35 hyaluronidase (Sigma-Aldrich, St. Louis, MO, USA) dissolved in M2 medium (Sigma-  
36 Aldrich). Prior to electroporation, the zona pellucida was partially removed by brief  
37 treatment with acid Tyrode's solution and the embryos were washed and briefly  
38 cultured in M16 medium (Sigma-Aldrich) at 37 °C and 5 % CO<sub>2</sub>. Electroporation with a  
39 mixture of ssDNA oligonucleotide targeting template, 16 µmol/l cr:trcrRNA hybrid  
40 targeting Dsg2 and 16 µmol/l Cas9 protein (all reagents from IDT, Coralville, IA, USA)  
41 was carried out using 1 mm gap electroporation cuvette and the ECM830  
42 electroporator (BTX Harvard Apparatus, Holliston, MA, USA). Two square 3 ms pulses  
43 of 30 V with 100 ms interval were applied. Surviving embryos were washed with M16  
44 medium and transferred immediately into the oviducts of 8–16-weeks-old  
45 pseudopregnant CrI:CD1(ICR) females that had been mated with sterile genetically  
46 vasectomized males the day before embryo transfer (0.5 dpc). Pregnant females were  
47 allowed to deliver and raise their pups until weaning age. In total 150 embryos were  
48 electroporated and 147 surviving embryos were transferred into 7 foster mothers. All  
49 foster mothers produced live litters with a total of 20 viable F0 pups. One F0 pup carried  
50 the desired mutation as confirmed by sequencing. This founder animal was bred to  
51 C57BL/6J partner. The mut/wt offspring from this mating was bred to C57BL/6J  
52 partners for 2 generations to establish the Dsg2-W2A mouse line.

53 For genotyping of the DSG2-W2A line, DNA was extracted from biopsies in 25 mmol/l  
54 NaOH and 0.2 mmol/l EDTA at 98 °C for 1 hour and neutralized with 40 mmol/l Tris pH  
55 5.5. PCR was performed using GoTaq G2 (M7845, Promega, Madison, WI, USA)  
56 according to manufacturer's instructions with the primers Dsg2-W2A for:  
57 GAATGTCTCCCCAAAGCTTTGGGTATG and Dsg2-W2A rev:  
58 CTGCTACCTTGGCAATCGGGTTC, which span the mutated region. The PCR  
59 product was restricted with 66.7 U/ml AluI (R0137, New England Biolabs, Ipswich, MA,  
60 USA) in CutSmart buffer (New England Biolabs) overnight at 37 °C. By subsequent

61 electrophoresis in a 3 % (w/v) agarose gel containing Midori Green Advanced (Nippon  
62 Genetics, Düren, Germany) for fluorescence DNA visualization, presence of a Dsg2-  
63 WT allele was detectable as 197 bp fragment, while Dsg2-W2A mutant allele was cut  
64 into a 109 bp and 72 bp fragment (Supplementary Figure 1C).

#### 65 ***Murine sample collection***

66 For heart dissection, mice were euthanized via i.p. pentobarbital overdose according  
67 to guidelines of the Cantonal Veterinary Office of Basel-Stadt and the University of  
68 Basel. Hearts were removed by lateral thoracotomy and directly immersed in ice-cold  
69 HBSS supplemented with 20 mmol/l 2,3-Butanedione monoxime (BDM, Sigma-  
70 Aldrich) unless stated otherwise. Morphology of the hearts was analyzed using a  
71 binocular stereo microscope (SZX2, Olympus, Shinjuku, Japan) and documented with  
72 a SLR camera (EOS 800D, Canon, Tokyo, Japan). Tissue was processed as described  
73 in the respective section.

74 For dissection of embryos, timed matings were performed and pregnant mice  
75 euthanized via i.p. pentobarbital overdose after the respective days. Embryos were  
76 dissected from the uterus and placed in HBSS. After image acquisition as described  
77 above, a tissue sample for genotyping was collected from the tail and embryos were  
78 processed as described in the *Histological staining* section.

#### 79 ***In vivo experiments***

80 At begin of the experiments mut/wt mice from the same litter were sex-matched and  
81 randomly allocated by stratified randomization to control or treatment group. Within the  
82 limits of a pilot experiment, number of animals were estimated with a power calculation.  
83 EMD527040 hydrochloride (EMD, N-[1-Oxo-5-(2-pyridinylamino)pentyl]-O-  
84 (phenylmethyl)-L-seryl-3-(3,5-dichlorophenyl)- $\beta$ -alanine hydrochloride, 637.47g/mol,  
85 custom made Cat. No. 7508, Tocris, Bristol, UK) was dissolved in DMSO at 60 mg/ml.  
86 For i.p. application, EMD was mixed 2:1 with sterile PBS and administered daily at a

87 concentration of 40 mg/kg body weight for the indicated time. 2:1 DMSO in PBS was  
 88 administered to the control group. During treatment, physical status of mice was  
 89 controlled daily. ECG measurements, sample collection and analysis were performed  
 90 as described in the respective section.

### 91 ***Plasmid generation and cloning***

92 For lentiviral overexpression plasmids, DNA for full length Dsg2-WT and full length  
 93 Dsg2-W2A mutation, respectively, were amplified from cDNA originating from liver  
 94 tissue of DSG2-WT and DSG2-W2A mice using Ascl-msDsg2-N forward and NotI-GT-  
 95 msDsg2-C reverse primers. Amplicons were ligated into Ascl and NotI digested  
 96 pLENTI-C-mGFP (#PS100071, OriGene, Rockville, MD, USA) according to standard  
 97 procedures. To produce the proteins used in the AFM experiments, the signal, pro-  
 98 peptide, and all extracellular domains of Dsg2-WT and Dsg2-W2A, respectively, were  
 99 amplified from murine cDNA using Afel-Kozak-msDsg2-N forward and XhoI-msDsg2-  
 100 C reverse primers. Amplicons were ligated into Afel and XhoI digested Fc-His-pEGFP-  
 101 N3 plasmid containing the Fc domain from human IGHG1 (bases 295-990) (a kind gift  
 102 of Nikola Golenhofen, Institute of Anatomy and Cell Biology, University of Ulm, Ulm,  
 103 Germany). For the Fc control construct, the signal peptide of murine interleukin 2 was  
 104 inserted N-terminally of the human Fc by annealing the oligomers NheI-Kozak-IL2  
 105 Signal and XhoI-IL2 Signal and ligating them into the NheI and XhoI digested Fc-His-  
 106 pEGFP-N3 plasmid.

### 107 ***Primers and oligomers for cloning***

108 Ascl-msDsg2-N forward: GTTTGGCGCGCCATGGCGCGGAGCCCCGGGT

109 NotI-GT-msDsg2-C reverse:

110 GTTTGCGGCCGCGTGGAGTAAGAATGTTGCATGGTG

111 Afel-Kozak-msDsg2-N forward: GTTTAGCGCTGCCACC

112 ATGGCGCGGAGCCCCGGGTGA

113 XhoI-msDsg2-C reverse: GTTCTCGAGGGCAGGGCCCAACCCGAC

114 NheI-Kozak-IL2 Signal:

115 CTAGCCACCATGTACAGGATGCAACTCCTGTCTTGCATTGCACTAAGTCTTGCA

116 CTTGTACGAATTCGC

117 XhoI-IL2 Signal:

118 TCGAGCGAATTCGTGACAAGTGCAAGACTTAGTGCAATGCAAGACAGGAGTTGC

119 ATCCTGTACATGGTGG

### 120 ***Cultivation of CaCo2 cells***

121 The human intestinal cell line CaCo2 with WT and DSG2 KO background were kindly  
 122 provided by Nicolas Schlegel (Department of General, Visceral, Vascular and Pediatric  
 123 Surgery, University Hospital Würzburg, Würzburg, Germany) and generated as  
 124 described.<sup>12</sup> CaCo2 cells were maintained in Dulbecco's Modified Eagle Medium  
 125 (DMEM, D6546, Sigma-Aldrich) supplemented with 10 % foetal bovine serum (S0615,  
 126 Merck, Darmstadt, Germany), 100 µg/ml penicillin/streptomycin (Applichem,  
 127 Darmstadt, Germany) and 2 mmol/l L-glutamine (Sigma-Aldrich) at 37 °C, 5 % CO<sub>2</sub>  
 128 and full humidity. For experiments, cells were seeded on TC-treated plastic cell culture  
 129 plates, grown to confluency and differentiated for seven days. All cells were quarterly  
 130 checked for mycoplasma contaminations using PCR and were proven negative.  
 131 CaCo2 cells were routinely authenticated by Short Tandem Repeat profiling.

### 132 ***Lentivirus generation and transduction***

133 Lentiviral particles were generated according to standard procedures. In brief,  
 134 HEK293T cells were co-transfected with the packaging vector psPAX2 (#12259,  
 135 Addgene, Watertown, MA, USA), the envelope vector pMD2.G (#12260, Addgene) and  
 136 the respective construct plasmid using TurboFect (Thermo Fisher Scientific, Waltham,  
 137 MA, USA). After 48 hours, virus particle containing supernatant was collected and  
 138 enriched using LentiConcentrator (OriGene). Cells were transduced with the

139 respective concentrated virus particles using 10 µg/mL polybrene (Sigma-Aldrich)  
140 according to the manufacturer's instructions. After 24 hours, medium was changed and  
141 cells cultivated for one week before starting with the respective experiments.  
142 Expression of the respective construct was confirmed via Western blot analysis.

### 143 ***Generation and cultivation of murine keratinocytes***

144 For isolation of murine keratinocytes from DSG2-W2A mut/mut and wt/wt mice, the  
145 epidermis of neonatal mice was separated from the dermis via incubation in dispase II  
146 solution (>2.4 U/ml dispase II, D4693, Sigma-Aldrich, in PBS) with 2x  
147 gentamicin/amphotericin B (CELLnTEC, Bern, Switzerland) over night at 4 °C.  
148 Keratinocytes were isolated by accutase (A6964, Sigma-Aldrich) for 20 minutes at  
149 room temperature and subsequent agitation. Released cells were cultured on collagen  
150 I coated plates (50201, IBIDI, Gräfelfing, Germany) in 0.06 mmol/l calcium murine  
151 keratinocyte medium (DMEM: Ham's F12 3.5:1.1 mixture, SO-41660, PAN-Biotech,  
152 Aidenbach, Germany) supplemented with 10 % calcium-free foetal bovine serum  
153 (S0615, Merck), 2 mmol/l stable glutamine (BioConcept, Allschwil, Switzerland),  
154 50µg/ml penicillin/streptomycin (Applichem), 10 ng/ml murine epidermal GF  
155 (Invitrogen, Carlsbad, CA), 1 mmol/l sodium pyruvate, 0.18 mmol/l adenine, 120 pmol/l  
156 cholera toxin, 5 µg/ml insulin, and 500 ng/ml hydrocortisone (all Sigma-Aldrich). Cells  
157 were kept in an incubator at 35 °C with 5 % CO<sub>2</sub> and 100 % humidity, the medium was  
158 changed every third day. When reaching confluency, cells were transferred into a new  
159 coated culture dish. After around six passages, cells were immortalized and could be  
160 expanded and seeded for experiments. 48 hours before experiments were conducted,  
161 1.8 mmol/l calcium was added to the medium to induce cell differentiation. Cells were  
162 quarterly checked for mycoplasma infections using PCR and were proven negative.

### 163 ***Cardiac slice culture***

164 Mice were sacrificed by i.p. injection of pentobarbital. The heart was dissected by  
165 lateral thoracotomy and placed in ice-cold oxygenated slicing buffer (136 mmol/l NaCl,  
166 5.4 mmol/l KCl, 1 mmol/l MgHPO<sub>4</sub>, 0.9 mmol/l CaCl<sub>2</sub>, 30 mmol/l 2,3-Butanedione  
167 monoxime, 5 mmol/l HEPES, 10 mmol/l glucose). After removal of both atria, the heart  
168 was embedded in 37 °C low melt agarose (Carl Roth, Karlsruhe, Germany) dissolved  
169 in slicing buffer without glucose. Using a LeicaVT1200 vibratome (Leica Biosystems,  
170 Nussloch, Germany), 300 µm thick tissue sections were cut with 1 mm amplitude and  
171 0.07 mm/s speed. Freshly cut sections were transferred into ice-cold slicing buffer. For  
172 incubations, sections were transferred to 0.4 µm polycarbonate membranes cell culture  
173 inserts (VWR, Radnor, PA, USA) and incubated in Claycomb medium supplemented  
174 with 10 % foetal calf serum, 2 mmol/l L-glutamine, 10U/l : 10µg/ml penicillin and  
175 streptomycin (all from Sigma-Aldrich) at 37 °C, 5 % CO<sub>2</sub> and treated with either rabbit  
176 anti-ITGαV/β6 1:15 (10D5, MAB2077Z, Sigma-Aldrich) with same amount of normal  
177 rabbit IgG (2729, Cell Signaling Technology, Danvers, MA, USA) as control IgG, or the  
178 selective TGFβ type I receptor inhibitor GW788388, 10 µmol/l (SML0116, Sigma-  
179 Aldrich, solved in DMSO) with DMSO as vehicle control. After treatment for 24 hours,  
180 cardiac slices were washed in HBSS on inserts and processed further for  
181 immunostaining, RNA isolation and Western blot analysis as described.

### 182 ***Dissociation assay***

183 Cells were treated as indicated and grown to confluency in 24-well plates. Cell  
184 monolayers were washed with HBSS and incubated with dissociation buffer (dispase  
185 II 2.5 U/mL, Sigma-Aldrich, D4693 in HBSS) at 37 °C till detachment of the cell  
186 monolayer from well bottom. After detachment, monolayers were mechanically  
187 stressed by defined pipetting using an electrical pipette (Eppendorf, Hamburg,  
188 Germany). The total number of resulting fragments per well was determined using a  
189 binocular stereo microscope (SZX2, Olympus). Fragments were counted if they were



190 clearly visible at 1.25-fold magnification. The number of fragments is an indirect  
191 measure for intercellular cohesion. Images were acquired with a SLR camera (EOS  
192 800D, Canon).

### 193 ***Western blot analysis***

194 Western blot analysis was performed using standard procedures. Tissue samples were  
195 homogenized in SDS-lysis buffer (12.5 mmol/l HEPES, 1 mmol/l EDTA, 12.5 mmol/l  
196 sodium fluoride, 0.5 % sodium dodecyl sulfate, pH 7.6) supplemented with protease  
197 inhibitor cocktail (cOmplete) and phosphatase inhibitor cocktail (PhosSTOP, both  
198 Roche, Basel, Switzerland) using FastPrep-24 5G bead beating grinder (MP  
199 Biomedicals, Santa Ana, CA, USA) and subsequently cleared by centrifugation.  
200 Confluent cell monolayers were washed with PBS and scraped in supplemented SDS  
201 lysis buffer. Lysates were sonicated and the total protein amount was determined with  
202 a BCA protein assay kit (Thermo Fisher Scientific) according to the manufacturer's  
203 instructions. After lysates were denaturized for 5 minutes at 95 °C in Lämmli buffer, gel  
204 electrophoresis and wet blotting on nitrocellulose membranes (Novex, Thermo Fisher  
205 Scientific) were performed according to standard procedures. After a drying step,  
206 membranes were blocked in Intercept blocking buffer (Li-Cor, Lincoln, NE, USA)  
207 diluted 1:1 in TBS for 1 hour at room temperature. The following primary antibodies  
208 were incubated in antibody buffer (Intercept blocking buffer diluted 1:1 in TBS  
209 containing 0.2 % tween 20) at 4 °C overnight: Mouse anti-DSG1/2 (61002, Progen,  
210 Heidelberg, Germany), mouse anti-DSP (61003, Progen), mouse anti-PG (61005,  
211 Progen), mouse anti-N-Cadherin (NCAD, 610921, BD Bioscience, Franklin Lakes, NJ,  
212 USA), mouse anti-PKP2 (651101, Progen), rabbit anti-ITGB6 (HPA023626, Sigma-  
213 Aldrich), mouse anti- $\beta$ -catenin (BCAT, 610154, BD Bioscience), rabbit anti-GAPDH  
214 (10494-1-AP, Proteintech, Rosemont, IL, USA), mouse anti- $\alpha$ -tubulin (ab7291, Abcam,  
215 Cambridge, UK), rabbit anti-ITGAV (ab179475, Abcam), mouse anti-vinculin (VCL,

216 V9264, Sigma-Aldrich), rabbit anti-talin-2 (TLN2, MA5-42740, Thermo Fisher  
217 Scientific).

218 The secondary antibodies goat anti-mouse 800CW (925-32210) and goat anti-rabbit  
219 680RD (925-68071, both Li-Cor) were incubated in TBS containing 0.1 % tween20 for  
220 1 hour. Odyssey FC imaging system was used for fluorescence-based detection.  
221 Median band density was quantified applying ImageStudio (both Li-Cor) according to  
222 manufacturer's instructions and normalized to the respective loading control.

### 223 ***Immunostaining***

224 For cryosections, tissue was embedded in 12 % mowiol 4-88, 5 % sorbitol, 0.5 %  
225 bovine serum albumin, 0.025 % sodium azide and frozen at -50 °C. 10 µm thick section  
226 were cut by a Cryo Star NX70 cryostat (Thermo Fisher Scientific), transferred to  
227 SuperFrost plus glass slides (Thermo Fisher Scientific), and air-dried. For  
228 immunostaining, sections were dried at 37 °C for 30 min, fixed in 2 %  
229 paraformaldehyde in PBS for 10 min, permeabilized with 0.2 % triton X-100 in PBS for  
230 1 hour, and blocked with 3 % bovine serum albumin/0.12 % normal goat serum in PBS  
231 for 1 hour.

232 Fixed cardiac tissue embedded in paraffin was cut into 5 µm thick sections by an  
233 automated microtome (HM355S, Thermo Fisher Scientific). After deparaffinization,  
234 temperature-mediated antigen retrieval was performed in Tris/EGTA buffer (10 mmol/l  
235 Tris, 1 mmol/l EGTA, 0.05 % tween 20, pH 9) for 20 min at 95 °C. Tissue was  
236 permeabilized in 0.1 % triton X-100 in PBS for 5 min and blocked with 3 % bovine  
237 serum albumin/0.12 % normal goat serum in PBS for 1 hour.

238 The following primary antibodies were incubated in PBS at 4 °C overnight: Mouse anti-  
239 DSG1/2 (61002, Progen), mouse anti-DSP (61003, Progen), mouse anti-PG (61005,  
240 Progen), mouse anti-desocollin-2/3 (DSC2/3, 326200, Thermo Fisher Scientific),  
241 mouse anti-N-cadherin (NCAD, 610921, BD Bioscience), rabbit anti-ITGB6

242 (HPA023626, Sigma-Aldrich), rabbit anti-ITGB6/AV (BS-5791R, Bioss, Woburn, MA,  
243 USA), rabbit anti-ITGB1 (GTX112971, GeneTex, Irvine, CA, USA), rabbit anti-  
244 pSMAD2(S465/S467)/pSMAD3(S423/S425) (AP0548, Abclonal, Wuhan, China),  
245 rabbit anti-connexin-43 (CX43, SAB4501175, Sigma-Aldrich), rabbit anti-ITGAV  
246 (ab179475, Abcam), mouse anti-vinculin (VCL, V9264, Sigma-Aldrich), rabbit anti-  
247 talin-2 (TLN2, MA5-42740, Thermo Fisher Scientific). Respective secondary goat anti-  
248 rabbit or goat anti-mouse antibodies coupled to Alexa Fluor 488, Alexa Fluor 568 (both  
249 Thermo Fisher Scientific), or cy5 (Dianova, Hamburg, Germany) were incubated for  
250 1 hour at room temperature and DAPI (Sigma-Aldrich) was added for 10 minutes to  
251 counterstain nuclei. To visualize F-actin, phalloidin coupled to Dylight 488 (21833,  
252 Thermo Fisher Scientific) or CruzFluor 647 (sc-363797, Santa Cruz Biotechnology,  
253 Dallas, TX, USA) was used. Tissue samples were mounted with Fluoromount Aqueous  
254 Mounting Medium (Sigma-Aldrich). For wide field image acquisition, a 40x objective  
255 mounted on a Nanozoomer S60 slide scanner (Hamamatsu Photonics K.K.,  
256 Hamamatsu, Japan) and for confocal image acquisition a 63x PL APO NA = 1.4  
257 objective mounted on a LSM710 confocal microscope (Carl Zeiss, Jena, Germany) or  
258 a 63x HCX Plan-Apo NA = 1.4 objective mounted on a Leica SP5 confocal microscope  
259 (Leica Biosystems) was used. Fluorescence image analysis was performed by  
260 Fiji/ImageJ (NIH) or QuPath (QuPath developers, The University of Edinburgh, UK,  
261 version 0.2.3). For analysis of staining intensity following masks and regions were  
262 defined: (i) "cardiomyocytes" – outline of the total cardiomyocyte area by thresholding  
263 of the f-acting signal, (ii) "nucleus" – detection of nuclei via DAPI staining applying the  
264 QuPath cell detection tool, (iii) "ICD" – outlines of ICD area were created with threshold  
265 of a respective counterstain or QuPath brush tool, (iv) "cytosol" - area of ICD was  
266 subtracted from cardiomyocyte area. Respective masks were applied to the channel

267 of interest to measure mean nuclear intensity in selected areas. The corresponding  
268 mean signal background was subtracted for ICD intensity.

### 269 ***Histological staining***

270 Tissue was embedded and cut as described in the section *Immunostaining*.  
271 Haematoxylin/ Eosin (HE) staining was performed according to standard procedures.  
272 In brief, sections were stained with Mayer's haemalaun solution (Sigma-Aldrich) for 5  
273 min, washed, dehydrated in an increasing ethanol series and stained with 0.5 % (w/v)  
274 eosin solution for 5 min. After washing steps in ethanol and methyl salicylate, sections  
275 were mounted with DPX Mountant (Sigma-Aldrich).

276 For Picro-Sirius red collagen stain, sections were fixed in 2 % paraformaldehyde in  
277 PBS for 10 min. After washing in PBS and distilled water, sections were re-fixed in  
278 Bouin's solution (71 % picric acid, 24 % formaldehyde 37-40 %, 5 % glacial acetic acid)  
279 for 1 hour at 56 °C. Sections were then washed in distilled water and stained in Picro-  
280 Sirius Red Solution (SRS250, PSR-1-IFU, ScyTek laboratories Inc., Logan, UT, USA)  
281 for 1 hour. Staining reaction was stopped with 0.5 % acetic acid. After washing in 100  
282 % ethanol, sections were cleared in methyl salicylate and mounted in DPX Mountant  
283 (Sigma-Aldrich).

284 Images of histological sections were acquired with a 40x objective mounted on a  
285 Nanozoomer S60 slide scanner (Hamamatsu Photonics K.K.) and visualized with the  
286 NDP.view software (version 2.7.43, Hamamatsu Photonics K.K.). The area of collagen  
287 was analysed by a blinded experimenter using the red fluorescence signal of collagen  
288 staining in QuPath software (QuPath developers). Areas of interest (i.e. right and left  
289 ventricles) were annotated and the total and fibrotic tissue area was classified  
290 according to the intensity threshold, which was calculated as 40 intensity values above  
291 the median intensity (for collagen- positive areas) and 25% of median intensity (for

292 total tissue area). For analysis of hypertrophy, the area of 20 cross-sectioned  
293 cardiomyocytes with a central nucleus was measured for every heart.

#### 294 ***Protein purification***

295 For protein expression, the Fc control construct or the extracellular domain of murine  
296 Dsg2-WT or Dsg2-W2A were cloned into the Fc-His-pEGFP-N3 vector as described  
297 above. Wildtype Chinese ovarian hamster cells (CHO) were transfected with the  
298 respective plasmids using TurboFect (Thermo Fisher Scientific) according to  
299 manufacturer's instructions and selected with geneticin (VWR) for two weeks. After  
300 stable cells were grown to confluency, the cell culture supernatant was collected, the  
301 proteinase inhibitors leupeptin, aprotinin, pepstatin and phenylmethylsulfonylfluoride  
302 (all VWR) added and remaining cells removed by centrifugation and filtration. The  
303 cleared supernatant was added to a column containing HisLink Protein Purification  
304 Resin (V8823, Promega) and his-tag fusion proteins were purified according to  
305 manufacturer's instructions. After imidazole-mediated elution, proteins were  
306 concentrated using Amicon Ultra-4 30 kDa centrifugal filter tubes (#UFC803024,  
307 Merck) and resuspended in sterile HBSS containing 1.2 mmol/l  $\text{Ca}^{2+}$ . Protein  
308 concentration was determined by BCA protein assay kit (Thermo Fisher Scientific) and  
309 purity confirmed by Western blot analysis as described above.

#### 310 ***Single molecule force spectroscopy***

311 For force spectroscopy experiments, a Nanowizard IV Atomic Force Microscope (AFM,  
312 JPK Instruments, Berlin, Germany) mounted on an inverted fluorescence microscope  
313 (IX83, Olympus) was used. Recombinant proteins were generated as described in the  
314 section *Protein purification*. Flexible Si<sub>3</sub>N<sub>4</sub> AFM probes (MLCT cantilever, Bruker,  
315 Billerica, MA, USA) and mica surfaces (Grade V-4, 01874-CA, Structure Probe, Inc.,  
316 West Chester, PA, USA) were coated with aldehyde-PEG<sub>20</sub>-NHS ester spacer (BP-  
317 24296, Broadpharm, San Diego, CA, USA) to link recombinant molecules at a

318 concentration of 0.15 mg/mL as described in <sup>43</sup>. Force spectroscopy measurements  
319 were performed with the pyramid-shaped D-tip (nominal spring constant: 0.03 N/m) on  
320 functionalized mica sheets in HBSS containing 1.2 mmol/l Ca<sup>2+</sup> and 0.1 % BSA at 37  
321 °C. Spring constant was calibrated for each cantilever at 37 °C applying the thermal  
322 noise method. <sup>44</sup> Force spectroscopy experiments were performed in force mapping  
323 mode using following settings: relative setpoint 0.4 nN, z-length 0.3 – 0.5 µm, extend  
324 delay 0.1 s, pulling speed as indicated ranging from 0.5 µm/s to 15 µm/s, scanning  
325 area: 10 µm x 10 µm, 25 px x 25 px and recorded with the SPM Control v.4 software  
326 (JPK Instruments). Force distance blots were analysed using JPKSPM Data  
327 Processing software (version 6, JPK Instruments). For calculation of force histogram,  
328 extreme peak curve fit and application of Bell's equation, Origin software (Originlab,  
329 Northampton, MA, USA) was used.

### 330 ***Echocardiography and Electrocardiogram (ECG)***

331 Transthoracic echocardiography was performed using the Vevo 2100 ultrasound  
332 system (VisualSonics, Toronto, ON Canada) equipped with a MS-550 linear-array  
333 probe working at a central frequency of 40 MHz. After the animals were anesthetized  
334 with 3.0 % (v/v) isoflurane carried by pure oxygen, they were placed at supine position  
335 on a pre-warmed imaging platform. Anesthesia was maintained by 1.5 % (v/v)  
336 isoflurane through a nose cone and the body temperature was controlled at around 37  
337 °C by a rectal thermocouple probe. Eye gel (Lacrinorm) was applied to prevent ocular  
338 dehydration. Needle probes attached to ECG leads embedded in the imaging platform  
339 were inserted subcutaneously to each limb for ECG recording. Hairs on the chest were  
340 removed by applying commercially available hair removal cream (Nair). ECG was  
341 monitored during the whole procedure. LV geometry and function were evaluated using  
342 2D guided M-mode at the mid-papillary muscle level from parasternal short-axis. LV  
343 anterior (LVAW) and posterior (LVPW) wall thickness and internal dimensions (LVID)

344 were measured from the M-mode during systole (s) and diastole (d). Values were  
345 averages of three cardiac cycles. Left ventricular ejection fraction (EF) was calculated  
346 from derived volumes (Vol), which are computed based on the Teichholz formula (LV  
347  $\text{Vol;d} = (7.0 / (2.4 + \text{LVID;d})) \times \text{LVID;d}^3$ ,  $\text{LV Vol;s} = (7.0 / (2.4 + \text{LVID;s})) \times \text{LVID;s}^3$ , EF  
348  $\% = 100 \times ((\text{LV Vol;d} - \text{LV Vol;s}) / \text{LV Vol;d})$ ). Left ventricular mass (LV Mass) was  
349 calculated based on a corrected cube model ( $\text{LV Mass} = 1.053 \times ((\text{LVAW;d} + \text{LVID;d}$   
350  $+ \text{LVPW;d})^3 - \text{LVID;d}^3) \times 0.8$ ). Pulse-Wave (PW) Doppler imaging and tissue Doppler  
351 imaging in the apical four-chamber view were used to record mitral Doppler flow  
352 spectrum and mitral annulus velocity at the septal side, respectively. Peak blood  
353 velocity of mitral early filling (E), later atrial contraction (A), isovolumic contraction time  
354 (IVCT), isovolumic relaxation time (IVRT), aortic ejection time (AET), and peak annulus  
355 velocity at early diastole (E') were measured. Ratios of E/A, E/E' and Tei index (Tei  
356  $\text{index} = (\text{IVCT} + \text{IVRT}) / \text{AET}$ ) were calculated. Blood flow through the pulmonary artery  
357 was recorded with PW Doppler imaging in the parasternal long-axis view for the  
358 measurements of pulmonary acceleration time (PAT) and pulmonary ejection time  
359 (PET). The ratio of PAT/PET was calculated. To assess RV function, the dimensional  
360 changes of the RV outflow tract at aortic valve level were recorded by M-mode in the  
361 parasternal long axis view and calculated as RV FS. RV fractional area change (RV  
362 FAC) was measured with B-mode at the mid-papillary level in the parasternal short-  
363 axis view. Briefly, the RV areas at end-diastole (RV Area;d) and end-systole (RV  
364 Area;s) were measured and RV FAC was calculated as  $100 \times (\text{RV Area;d} - \text{RV Area;s})$   
365  $/ \text{RV Area;d} (\%)$ . Tricuspid annular plane systolic excursion (TAPSE) was measured in  
366 M-mode on the lateral tricuspid annulus near the RV free wall in the apical four-  
367 chamber view. Data was transferred to an offline computer and analyzed with Vevo  
368 2100 software (version 1.6.0, VisualSonics) by an investigator blinded to the study  
369 groups.

370 For ECG recording, mice were attached to the PowerLab Data Acquisition System  
371 (ML870 Powerlab 8/30, ADInstruments, Sydney Australia). Needle probes were  
372 inserted subcutaneously in the right upper, and both lower limbs for acquisition of lead  
373 II. Baseline ECG was recorded for 30 min.

374 ECG data were recorded and analysed using the LabChart Pro 8 software  
375 (ADInstruments) equipped with the ECG Analysis Module. Peak amplitudes and  
376 intervals were determined from a curve averaged from 50 subsequent QRS complexes  
377 as mean of three time points. Definition of peaks is shown in Figure 2I.

378 After final measurements, mice were euthanized via cervical dislocation under  
379 anesthesia and hearts were dissected. Organs were embedded and stained as  
380 described in the section *Histological staining* for further analysis to determine the  
381 amount of fibrosis. For wet/dry ratio, weight of the isolated lungs was determined  
382 before and after drying the tissue for 24 hours at 37 °C.

### 383 ***Transmission Electron Microscopy (TEM)***

384 Ventricular cardiac tissue was dissected, cut and fixed in 2 % paraformaldehyde and  
385 2.5 % glutaraldehyde (Electron Microscopy Sciences, Hatfield, PA, USA) in 0.1 mol/l  
386 Pipes, 2 mmol/l CaCl<sub>2</sub>, pH 7.3. After 15 min incubation, fixative was renewed and  
387 incubated at 4 °C for 16 hours. Samples were washed three times with cold 0.1 mol/l  
388 Pipes, 2 mmol/l CaCl<sub>2</sub>, pH 7.3 and rinsed with 0.1 mol/l cacodylate buffer, pH 7.3. Post-  
389 fixation was performed for 1 hour at 4 °C using 1 % osmium tetroxide and 0.8 %  
390 potassium ferricyanide (Electron Microscopy Sciences) in 0.1 mol/l cacodylate buffer,  
391 pH 7.3. After washing steps with cacodylate buffer, pH 7.3 and ultrapure distilled water,  
392 tissue samples were stained with 1 % aqueous uranyl acetate (Electron Microscopy  
393 Sciences) for 1 hour at 4 °C. Dehydration was performed by an ascending ethanol  
394 series at 4 °C. After three washes with 100 % ethanol, samples were rinsed in acetone  
395 and first embedded in a mixture of resin/acetone followed by pure Epon 812 resin



396 (Electron Microscopy Sciences) over night. Samples were mounted on BEEM capsules  
397 (Electron Microscopy Sciences) filled with EPON. After polymerization at 60 °C for 48  
398 hours, samples were removed from the EPON block with the nitrogen hot water  
399 method. 70 nm thin serial sections, cut with a diamond knife, were mounted on formvar-  
400 carbon coated copper slot grids, stained with uranyl acetate and Reynolds's lead  
401 citrate. Samples were examined in a FEI Tecnai T12 spirit Transmission Electron  
402 Microscope (Thermo Fisher Scientific) operating at 80 kV equipped with a CCD Veleta  
403 digital camera.

#### 404 ***RNA isolation***

405 Cardiac tissue was washed in ice-cold HBSS and lysed in TRI reagent (Molecular  
406 Research Center, Inc., Cincinnati, OH, USA). Tissue homogenization was conducted  
407 via the FastPrep-24 5G bead beating grinder (MP Biomedicals, Santa Ana, CA, USA)  
408 using 2.8 mm stainless steel beads (Sigma-Aldrich) according to manufacturer's  
409 protocol with subsequent centrifugation to clear the lysate. RNA was isolated via the  
410 Direct-zol RNA MiniPrep kit including Zymo-Spin II and DNase restriction step (R2050,  
411 Zymo research, Irvine, CA, USA).

#### 412 ***Quantitative Real time PCR (qRT-PCR)***

413 RNA was isolated as described above. Quantity and quality of RNA was determined  
414 by Nanodrop 1000 Spectrophotometer (Thermo Fisher Scientific). Up to 1 µg of  
415 isolated RNA was used for reverse transcription with SuperScript III (Thermo Fisher  
416 Scientific). Quantitative real time PCR was performed with StepOne Real time PCR  
417 Systems (Applied Biosystems) using Power SYBR Green PCR Master Mix (Thermo  
418 Fisher Scientific). Primers are listed in Supplementary Table 3. As reference, the mean  
419 Ct value of *Gapdh* and *Tubg2* of the respective sample was used.

#### 420 ***Mouse RNA-sequencing (RNA-Seq)***

421 For transcriptomic analysis before and after onset of fibrosis, hearts of 5-days- and 9-  
422 weeks-old mice were dissected. Wt/wt and mut/mut mice were matched for age and  
423 sex. For 5-days-old mice, atria were removed and both ventricles lysed. For 9-weeks-  
424 old animals, similar sized tissue samples were taken from the right and left ventricle  
425 via a 3 mm diameter biopsy punch (Viollier, Allschwil, Switzerland). RNA was isolated  
426 as described in the section *RNA isolation*. RNA samples were quality-checked on the  
427 TapeStation instrument (Agilent Technologies, Santa Clara, CA, USA) using the RNA  
428 ScreenTape (Agilent, #5067-5576). RNA were quantified by Fluorometry using the  
429 QuantiFluor RNA System (#E3310, Promega). Library preparation was performed,  
430 starting from 200ng total RNA, using the TruSeq Stranded mRNA Library Kit  
431 (#20020595, Illumina, San Diego, CA, USA) and the TruSeq RNA UD Indexes  
432 (#20022371, Illumina). 15 cycles of PCR were performed. Libraries were quality-  
433 checked on the Fragment Analyzer (Advanced Analytical, Ames, IA, USA) using the  
434 Standard Sensitivity NGS Fragment Analysis Kit (#DNF-473, Advanced Analytical)  
435 revealing excellent quality of libraries (average concentration was  $179\pm 9$  nmol/l and  
436 average library size was  $329\pm 3$  base pairs). For Sequencing, samples were pooled to  
437 equal molarity. The pool was quantified by Fluorometry using the QuantiFluor ONE  
438 dsDNA System (#E4871, Promega). Libraries were sequenced Paired-End 38 bases  
439 (in addition: 8 bases for index 1 and 8 bases for index 2) using the NextSeq 500 High  
440 Output Kit 75-cycles (#FC-404-1005, Illumina) loaded at 1.8pM and including 1 % PhiX.  
441 Primary data analysis was performed with the Illumina RTA version 2.11.3. On average  
442 per sample:  $38.7\pm 4.6$  million pass-filter reads were collected on that NextSeq 500  
443 Flow-Cell.

#### 444 ***Mouse RNA-Seq data analysis***

445 Reads were aligned to the mouse mm10 genome using the aligner STAR (version  
446 2.7.3a) <sup>45</sup> with extra options "--outFilterMultimapNmax 10 --outSAMmultNmax 1" for

447 handling multimapping reads. Aligned reads were assigned to ensembl genes (version  
448 101) using the tool featureCounts from the subread package (version 2.0.1) <sup>46</sup> with  
449 extra options "-O -M --read2pos5 --primary-s 2". All further analysis steps were  
450 performed with R/Bioconductor (R version 4.0.3, Bioconductor version 2.50.0). Gene  
451 counts were loaded into R and differential gene expression analysis followed the  
452 edgeR workflow <sup>47</sup>. Specifically, genes were filtered for expression using the function  
453 filterByExpr which retained 19504 genes. Samples were classified into 4 groups  
454 according to genotype (wt/wt and mut/mut) and time point (5 days and 9 weeks) and  
455 differential gene expression was performed between all 4 groups using the functions  
456 glmQLFit and glmQLFTest. Benjamini-Hochberg procedure was performed to correct  
457 for multiple testing. Principal component analysis (PCA) was performed using log-CPM  
458 values and applying the R prcomp function on the row- and column-centered  
459 expression matrix. Sample clustering within heatmaps uses a correlation-based  
460 distance and employs the complete linkage algorithm of the R function hclust. Gene  
461 set enrichment analysis (GSEA) was performed for all differentially expressed genes  
462 of the indicated condition and compared to the collections of gene sets from MSigDb  
463 (<https://www.gseamsigdb.org/gsea/msigdb/collections.jsp>) or selected gene sets as  
464 indicated and relied on the edgeR function camera. External gene lists were tested on  
465 different contrasts using the cameraPR function of edgeR. Indicated p-values were  
466 calculated by function cameraPR of the R package limma (R version 4.0.3,  
467 Bioconductor version 2.50.0) using the log-fold-change as the input statistics and  
468 employing a rank based test. P-values are adjusted for multiple testing using the  
469 Benjamini-Hochberg procedure.

#### 470 ***Re-analysis of available ACM data sets and comparison with murine data sets***

471 Raw data of GEO data sets GSE107157 and GSE107480 were downloaded from the  
472 European Nucleotide Archive and mapped to the human hg38AnalysisSet genome

473 using STAR. Gene expression was quantified with featureCounts and relied on the  
474 human ensembl gene annotation (version  
475 96). Gene counts of both data sets were imported into R and analysed using the edgeR  
476 workflow. Specifically, genes were filtered by expression which retained 25293 genes,  
477 followed by a differential  
478 expression analysis contrasting the 4 sample groups which arise from tissue source  
479 (left and right ventricle) and disease (ARVC and healthy). In order to compare mouse  
480 specific gene lists to the human data, mouse genes were mapped to human orthologs  
481 using BioMart. The gene set of human orthologs was tested for differential enrichment  
482 in the mouse gene expression contrasts defined above using the function cameraPR.  
483 For analysis of the GEO data set GSE29819, the GEO2R tool was used (ACM samples  
484 versus normal). Results with adjusted p-values<0.05 were considered as significantly  
485 changed. The Venn diagram for overlap between two groups was determined with the  
486 Venny 2.1.0 online tool. Courtesy: Oliveros, J.C. (2007–2015) Venny. An interactive  
487 tool for comparing lists with Venn's diagrams. Publicly available at  
488 <http://bioinfogp.cnb.csic.es/tools/venny/index.html>.

#### 489 **Fluorescence recovery after photobleaching (FRAP)**

490 For FRAP measurements, neonatal cardiomyocytes cells were isolated from mice  
491 according to the protocol of Ehler et al.<sup>48</sup> and seeded in eight-well imaging chambers  
492 (Ibidi, Martinsried, Germany). 24 hours after seeding, the cells were transduced with  
493 DSG2-WT-mGFP or DSG2-W2A-mGFP lentivirus as described above. After the  
494 formation of visible junctions, FRAP measurements were performed on a Stellaris 8  
495 Falcon confocal microscope (Leica, Wetzlar, Germany) with a HC PL APO CS2  
496 63x/1.40 Oil objective, at 37 °C with 5 % CO<sub>2</sub> and constant humidity. The  
497 measurements were carried out and analysed with the fluorescence recovery after  
498 photobleaching wizard software (Leica). In order to inhibit contractions of

499 cardiomyocytes, 40 mmol/l BDM was added shortly before FRAP experiment. Regions  
500 of interests were defined along cell-cell junctions containing a desmosome between  
501 two neighbouring mGFP positive cells. After five frames of recording the prebleach  
502 intensity, mGFP signal was bleached shortly for 3 frames, using the 488 nm laser line  
503 at 50 % transmission on FRAP booster mode and the fluorescence recovery was  
504 recorded over 239 s with 100 frames for the initial 26 s and 45 frames for the remaining  
505 time. The fraction of mobile molecules was determined by the formula: Mobile fraction  
506 =  $(I_e - I_o) / (I_i - I_o)$ , where,  $I_e$  is the intensity reached after recovery time,  $I_o$  is the minimal  
507 intensity that was achieved right after bleaching, and  $I_i$  is the average prebleach  
508 intensity value.

#### 509 ***Triton X-100 protein separation***

510 Tissue samples were lysed in Triton extraction buffer (0.5 % triton X-100, 50 mmol/l  
511 MES, 25 mmol/l EGTA, 2 mmol/l MgCl<sub>2</sub>, pH 7.4) complemented with aprotinin,  
512 leupeptin, pepstatin, and phenylmethylsulfonyl fluoride by homogenization via the  
513 FastPrep-24 5G bead beating grinder (MP Biomedicals) using 2.8 mm stainless steel  
514 beads (Sigma-Aldrich). Samples were centrifuged at 12000 G, 5 min at 4 °C and  
515 cleared supernatant used as triton X-100 soluble fraction. The remaining pellet was  
516 lysed in SDS-lysis buffer and taken as triton X-100 non-soluble fraction. Protein  
517 concentration was determined using the BCA method (Thermo Fisher Scientific). The  
518 samples were loaded on SDS polyacrylamide gels and Western blot analysis was  
519 performed as described above. Total protein stain was performed with Ponceau stain  
520 (5 % glacial acetic acid, 0.1 % Ponceau S red dye) for 5 min. After de-stain with water,  
521 bands were acquired in the 700 nm channel. For normalization, intensity of the entire  
522 lane was taken.

#### 523 ***Structured illumination microscopy (SIM)***

524 For structured illumination microscopy (SIM) of cryopreserved mouse heart tissue,  
525 sectioning and immunostaining were performed as described. Image stacks spanning  
526 full ICDs were acquired using a DeltaVision OMX-Blaze (Version 4; Applied Precision)  
527 equipped with a 60x PL APO NA = 1.42 objective (Olympus) yielding a voxel size of  
528 0.04 x 0.04 x 0.125  $\mu\text{m}$ .

529 For analysis, the observer was generally blinded for the genotype. For evaluation of  
530 signal size and frequency within ICDs, the image stacks (typically containing one  
531 clearly defined ICD) were loaded into Imaris 9.6 (Bitplane AG, Schlieren, Switzerland).  
532 The ICD was annotated by manually outlining the DSP signal in every third image  
533 plane. The outlines were converted into a volume using the Manual Surface module.  
534 The Euclidian distance between two extreme ends of the surface was denoted as ICD  
535 length. To visualize the distribution of DSG2 and ITGB6 within the ICD, the signals  
536 were automatically detected and annotated as individual objects using similar  
537 thresholding values. The Statistics module was applied to calculate amounts and  
538 spatial relationships of signals.

539

**2. *Supplemental Figures and Figure Legends***

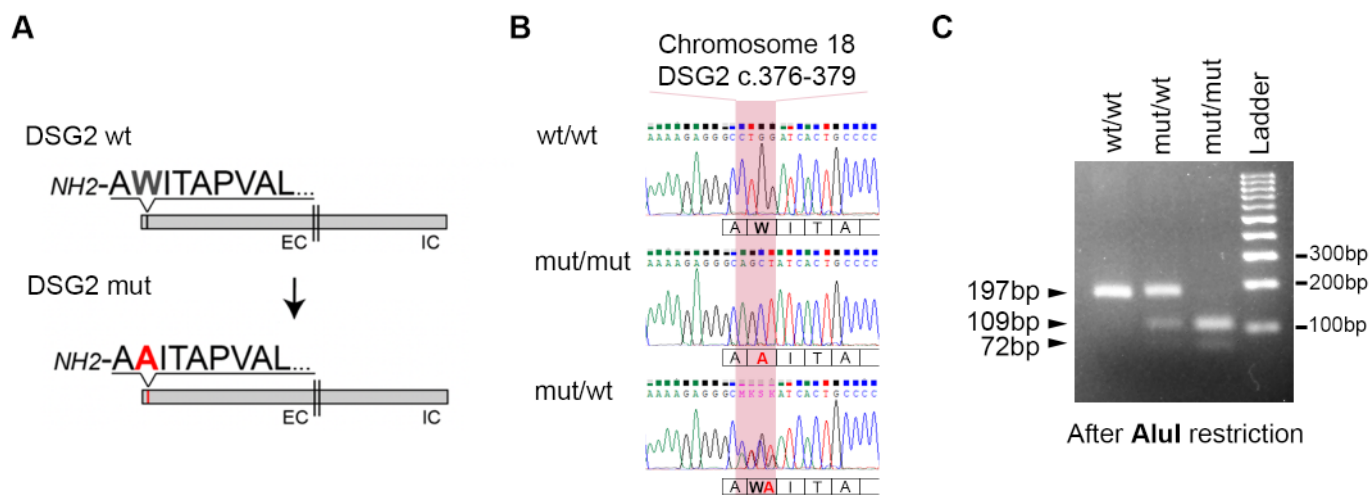

540 **Supplementary Figure 1. Sequencing and genotyping of the DSG2-W2A mouse**

541 **model.** (A) Schematic of the DSG2-W2A mutation within the mature DSG2 protein.

542 The extracellular (EC) and intracellular (IC) part of the molecule is indicated. (B)

543 Representative sequencing results of the DSG2-W2A mouse model for the indicated

544 genotypes. The bars below show the related translation in amino acids. (C)

545 Representative results of DSG2-W2A genotyping showing electrophoresis after

546 restriction of the PCR product with AluI.



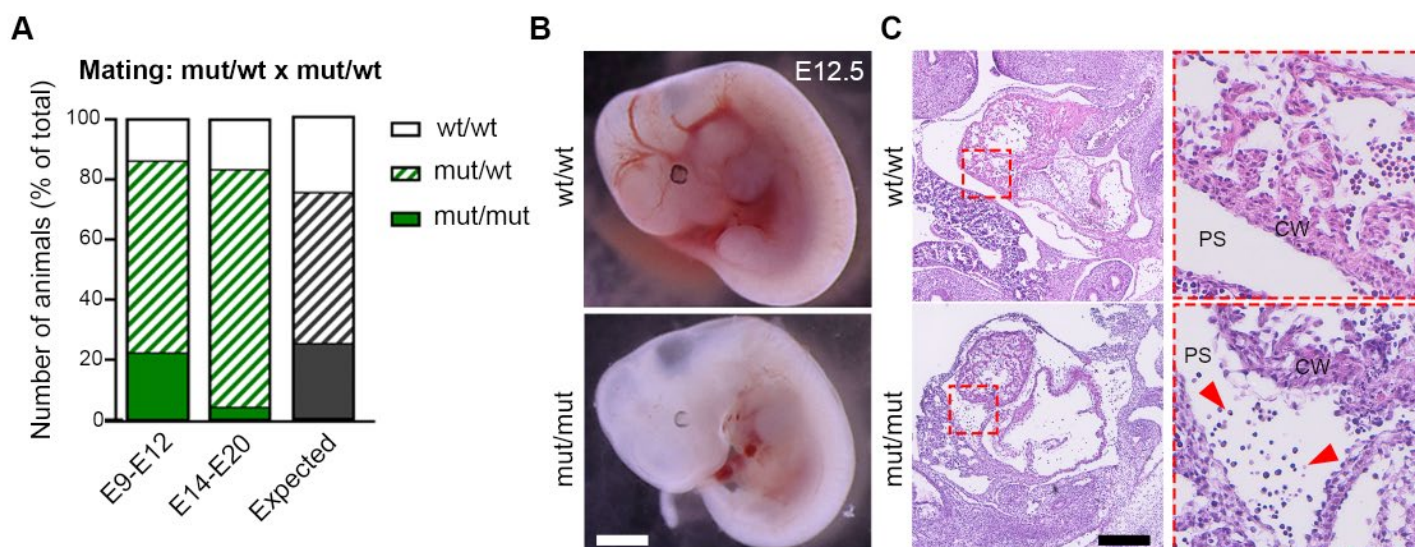

547 **Supplementary Figure 2. Loss of mut/mut animals during development due to**  
 548 **pericardial bleeding.** (A) Genotype analysis of embryos derived from matings of  
 549 mut/wt animals between developmental day E9 to E20 compared to the expected  
 550 genotype distribution according to Mendel in grey. (B) Macroscopic appearance of  
 551 viable embryos at day E12.5. Scale bar: 2 mm. (C) Haematoxylin/eosin staining of  
 552 sagittal sections of the cardiac area derived from embryos in B. Red rectangle depicts  
 553 area of zoomed insert. Scale bar overview: 1 mm. Red arrowheads point to blood  
 554 precursor cells in the pericardial space (PS) adjacent to the cardiac wall (CW). Images  
 555 are representative for 4 embryos per genotype from 4 litters.

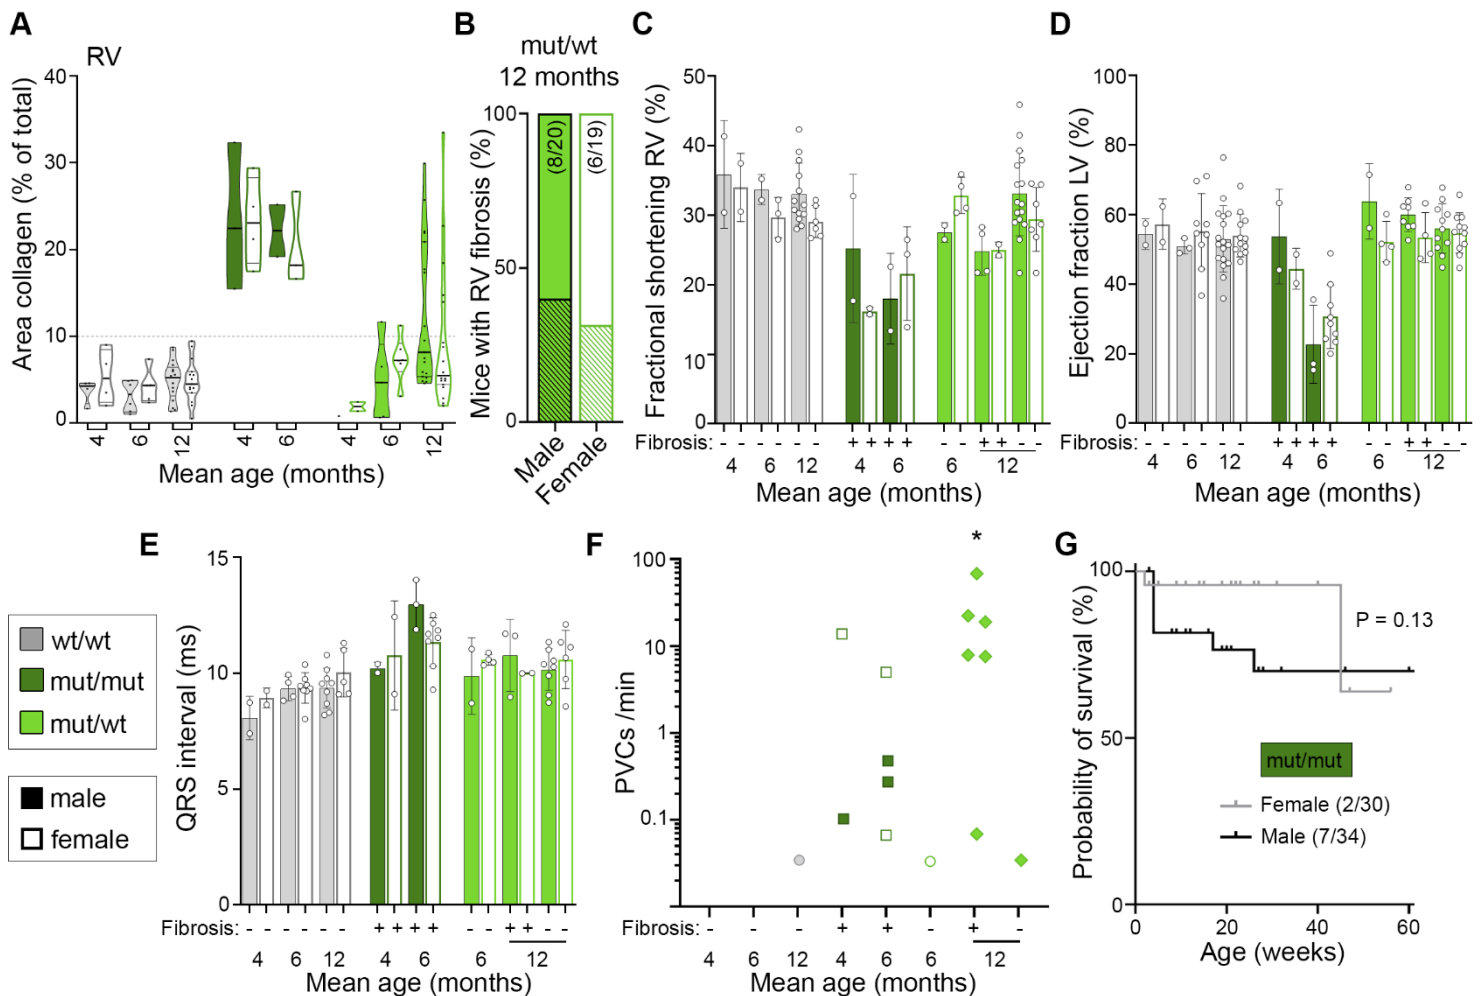

556 **Supplementary Figure 3. Sex-related effects in DSG2-W2A mice.** Data presented  
 557 in Figure 2 were re-analysed with respect to sex. **(A)** Cardiac fibrosis detected by  
 558 picrosirius red collagen staining with analysis of the area of collagen in the right  
 559 ventricle (RV). Hearts with more than 10% of collagen in the RV (grey dotted line) were  
 560 defined as “with fibrosis”. Each dot represents one animal. No significant changes  
 561 comparing male vs. female, two-way ANOVA, Sidak’s post hoc test. Lines indicate  
 562 median and quartile values. **(B)** Analysis of the fraction of mut/wt mice presenting with  
 563 RV fibrosis at 12 months of age. Values in bars indicate corresponding absolute  
 564 number of mice with fibrosis (hatched bar). Ventricular function detected by  
 565 echocardiography with analysis of **(C)** RV fractional shortening and **(D)** LV ejection  
 566 fraction. No significant changes comparing male vs. female, two-way ANOVA, Sidak’s  
 567 post hoc test. **(E)** ECG recorded in lead II with analysis of QRS interval. No significant

568 changes comparing male vs. female, two-way ANOVA, Sidak's post hoc test. **(F)** PVC  
569 burden detected by ECG and depicted as number of PVCs per minute, \* $P < 0.05$  male  
570 vs. female, two-way ANOVA, Sidak's post hoc test. **(G)** Kaplan-Meier survival diagram  
571 of DSG2-W2A mut/mut mice separated by sex. Vertical lines indicate drop-outs due to  
572 unrelated elimination (end of experiment, breeding, injuries). Values indicate  
573 corresponding absolute number of mice with sudden death compared to total number  
574 of mice evaluated. P as indicate, male vs. female. Gehan-Breslow-Wilcoxon test. Box  
575 with color indications of respective groups on the left apply to the entire figure.

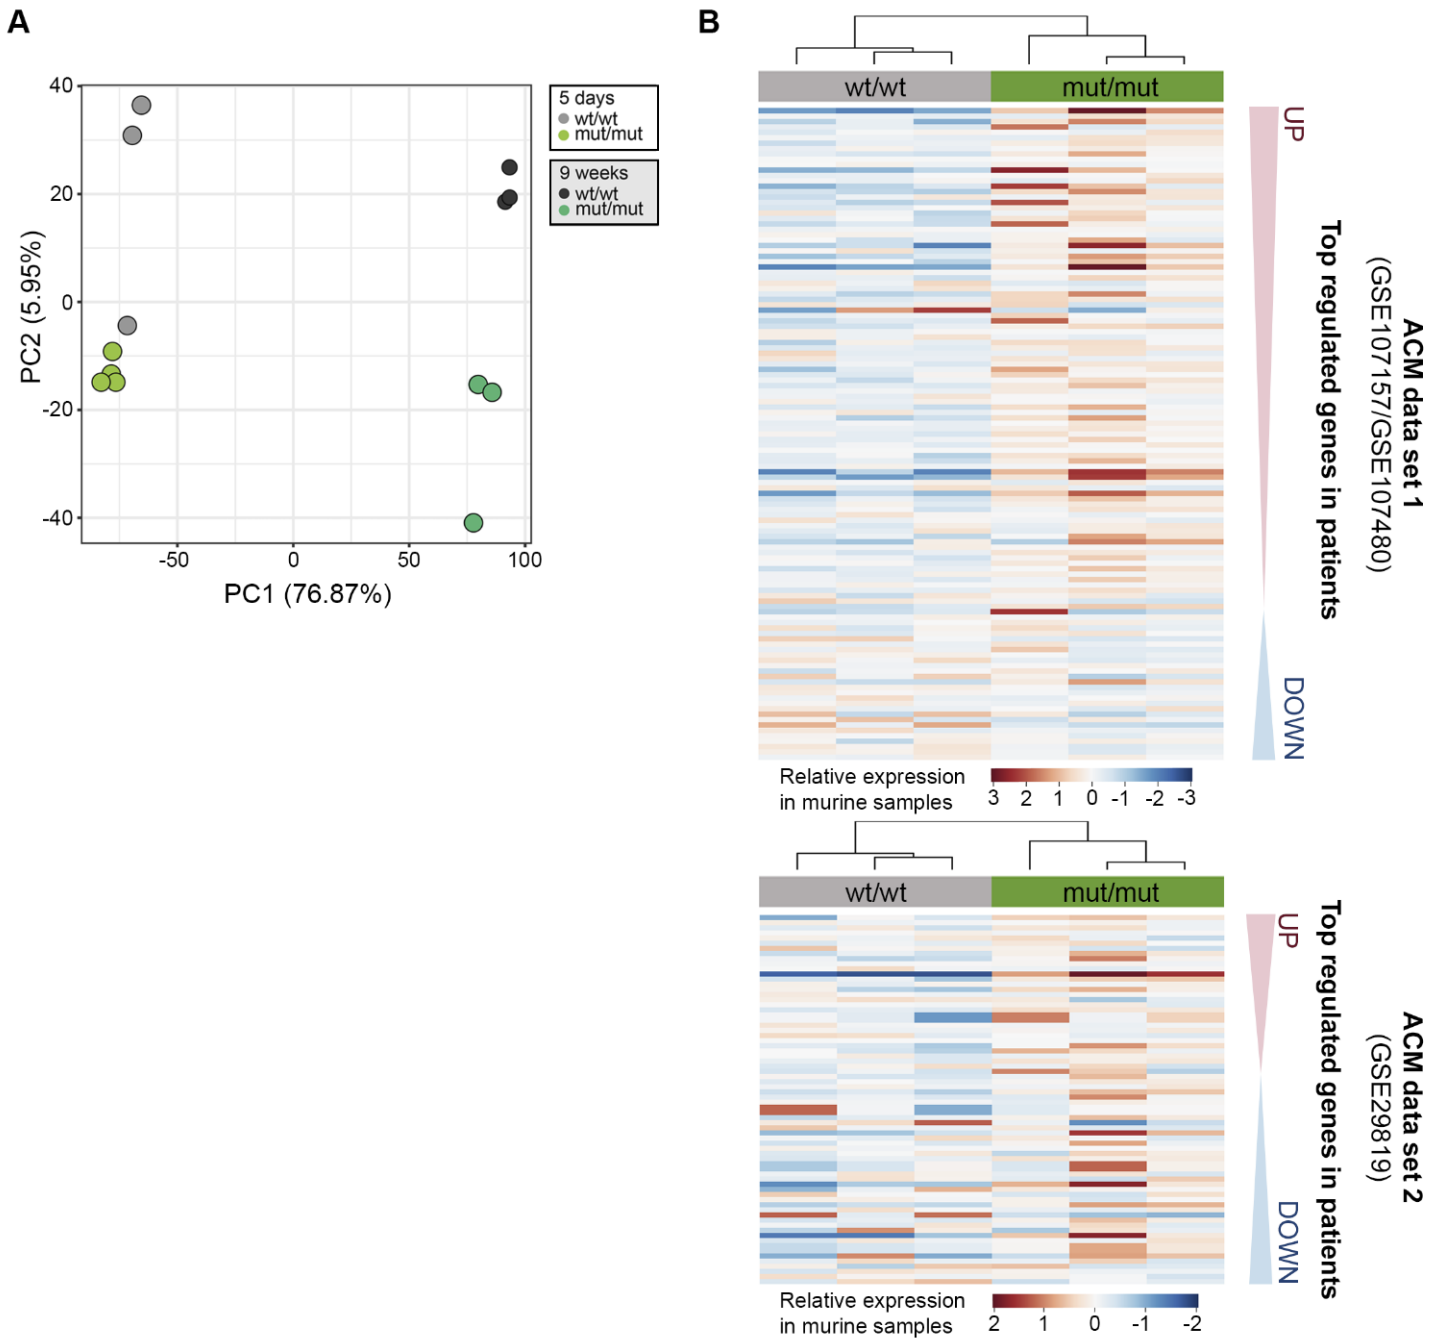

576 **Supplementary Figure 4. Validation of DGS2-W2A RNA-sequencing data. (A)**  
 577 Principal component analysis (PCA) of wt/wt and mut/mut hearts analysed by RNA  
 578 sequencing at the age of 5 days and 9 weeks showing the first two principal  
 579 components. **(B)** Heat maps of relative expression of the top differentially expressed  
 580 genes derived from two ACM patient data sets (GEO: GSE107157/GSE107480<sup>14</sup> and  
 581 GSE29819<sup>15</sup>) in 9-weeks-old mut/mut and wt/wt mouse hearts. Threshold of  $|\text{Log fold}$   
 582  $\text{change (FC)}| > 2$  and false discovery rate (FDR)  $< 0.05$  was applied for gene selection.  
 583 Samples are clustered based on their expression pattern. As depicted on the right,

584 genes are arranged according to their expression in patient data sets with most  
585 upregulated genes on top to most down regulated on the bottom.

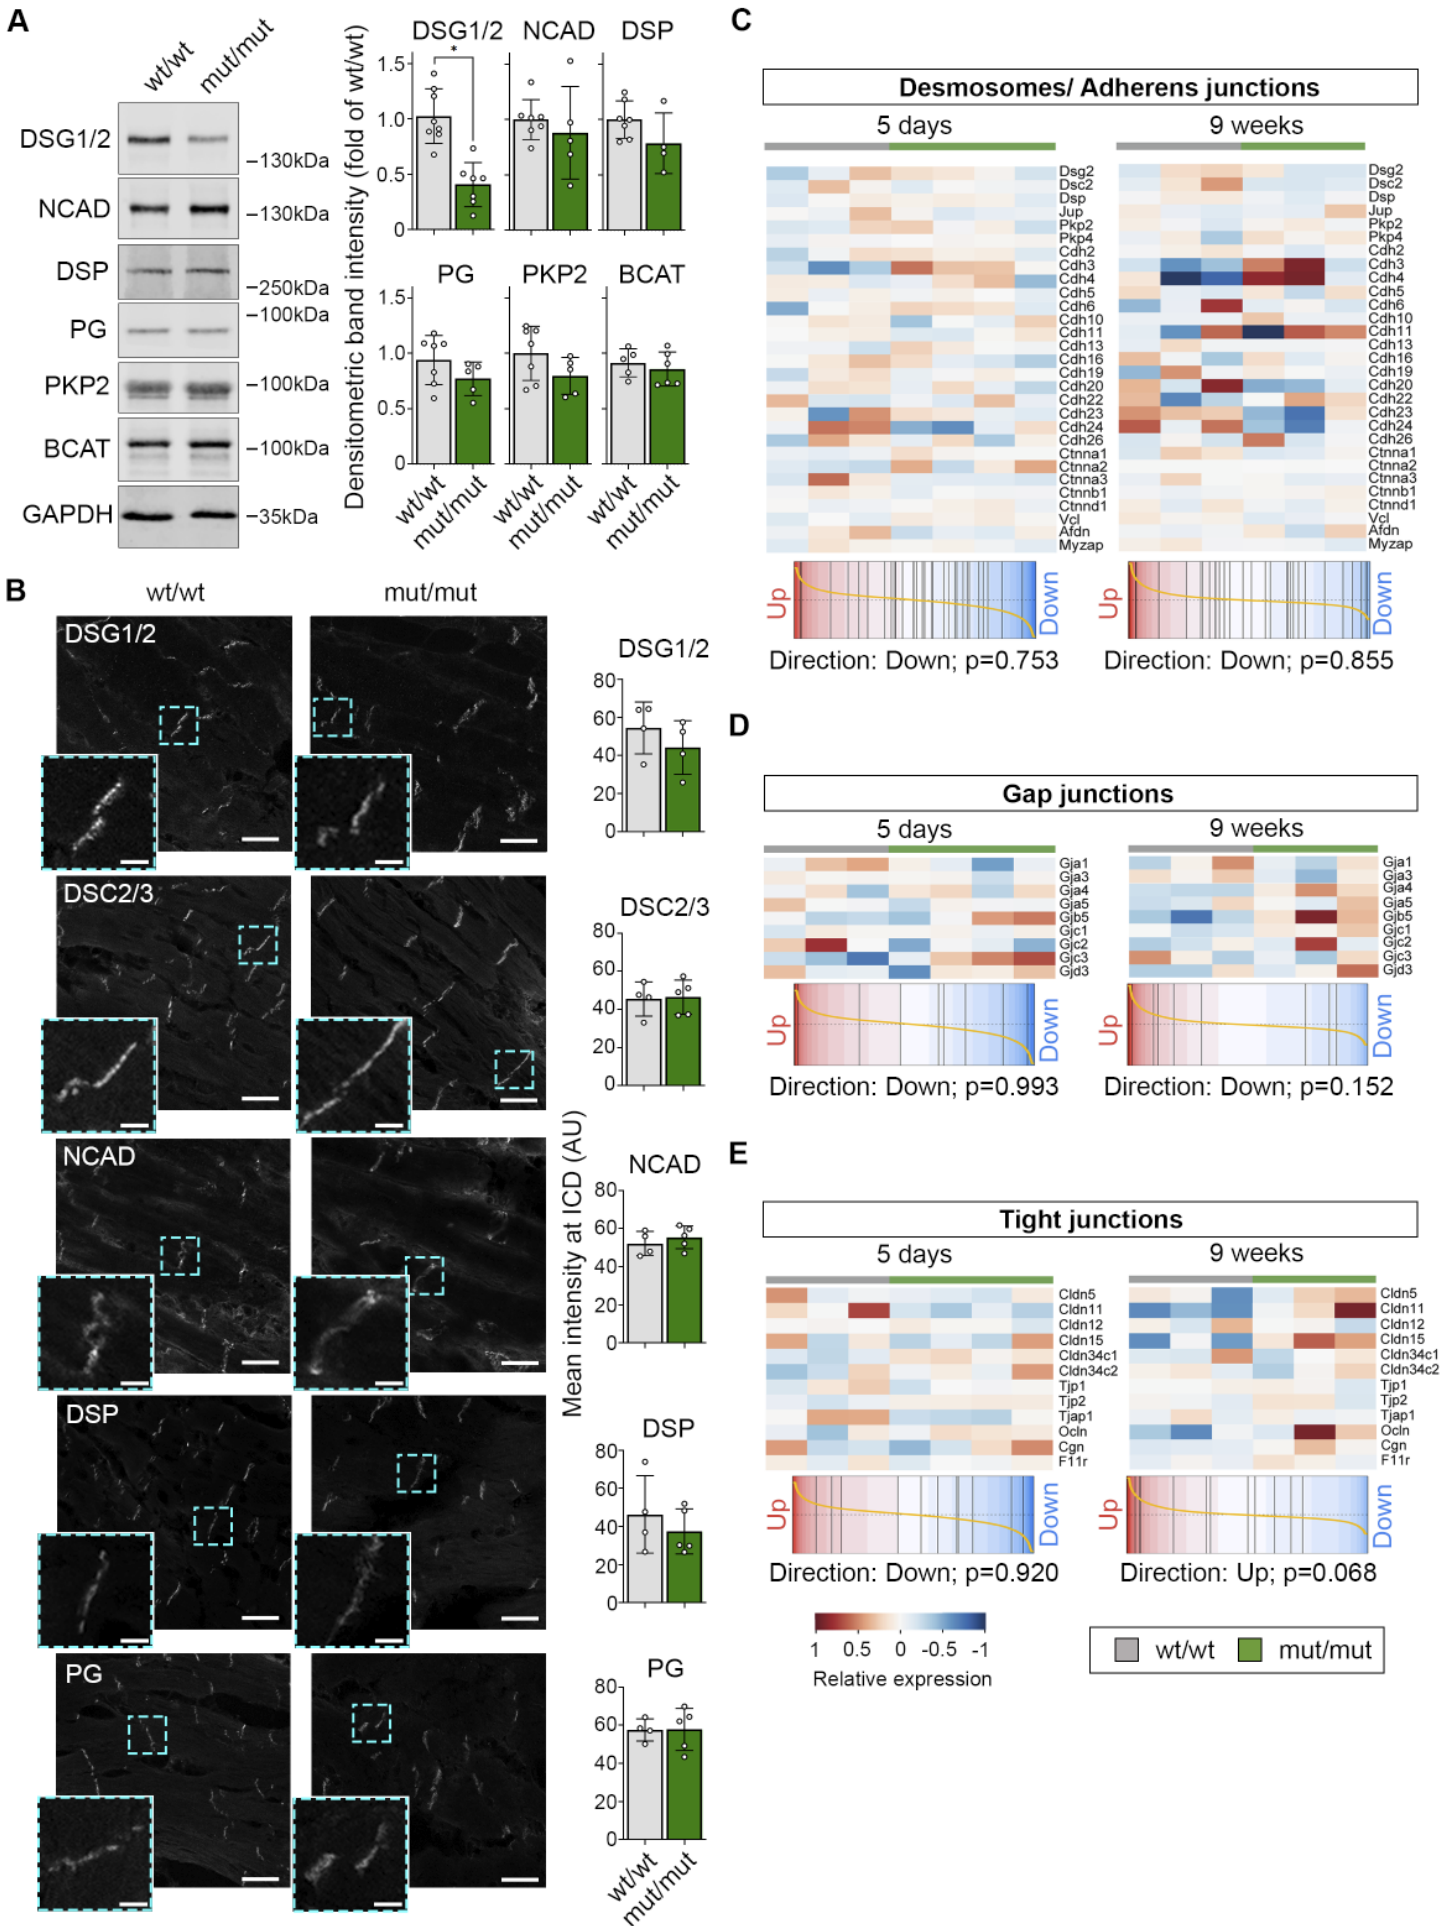

587 **Supplementary Figure 5. Junctional components are preserved in DSG2-W2A**  
588 **mutant hearts.** (A) Western blot analysis and (B) immunostainings of adult DSG2-  
589 W2A wildtype and mutant hearts with representative blots or images, respectively, on  
590 the left and related analysis on the right. Desmoglein-1/2 (DSG1/2), Desmocollin-2/3  
591 (DSC2/3), N-cadherin (NCAD), desmoplakin (DSP), plakoglobin (PG), plakophilin-2  
592 (PKP2)  $\beta$ -catenin (BCAT) were analysed as components of the mechanical junctions  
593 at the ICDs. GAPDH served as loading control in B. \*P< 0.05, unpaired Student's t-  
594 test. Scale bars in C: overview 20  $\mu$ m; insert 5  $\mu$ m. Cyan rectangle depicts area of  
595 zoomed insert. (C - E) Heat maps of relative expression of genes belonging to the  
596 indicated junction type (genes indicated on the right) in 5-days- and 9-weeks-old  
597 mouse hearts. Gene set enrichment analyses of the included genes is depicted as  
598 barcode plot below. Samples are arranged according to their genotype (wt/wt: grey;  
599 mut/mut: green).

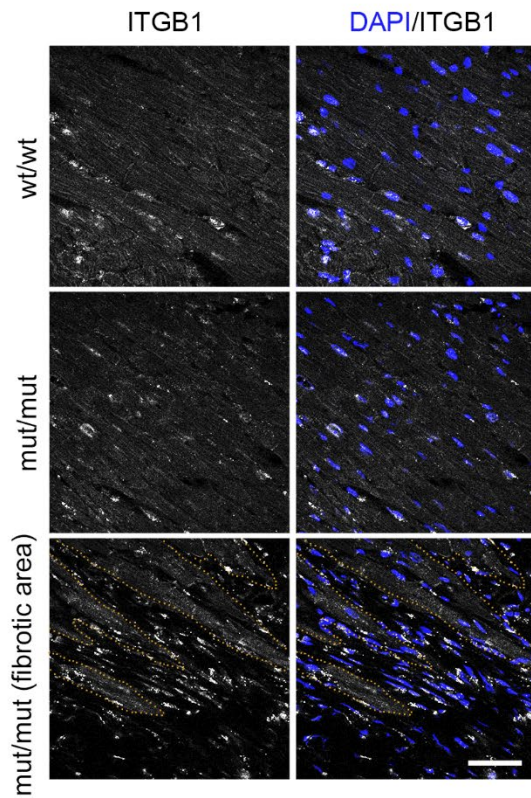

600 **Supplementary Figure 6. Integrin- $\beta$ 1 is not altered in DSG2-W2A mutant hearts.**  
601 Integrin- $\beta$ 1 (ITGB1) immunostaining and nuclei counter stain (DAPI, blue) in DSG2-  
602 W2A mice. Lower row shows an overview image of a fibrotic area in mut/mut hearts.  
603 Dotted orange line highlights border of fibrotic tissue. Scale bar: 50  $\mu$ m. Images  
604 representative for 5 mice per genotype.



605

**3. *Supplemental Tables and supporting information***

## Supplemental Material: CIRCULATIONAHA/2021/057329R3

|                         | wt/wt             | mut/mut           | mut/mut vs. wt/wt | wt/wt             | mut/wt           | mut/mut          | mut/mut vs. wt/wt | wt/wt             | mut/wt no fibrosis | mut/wt with fibrosis | mut/wt with fibrosis vs. wt/wt |
|-------------------------|-------------------|-------------------|-------------------|-------------------|------------------|------------------|-------------------|-------------------|--------------------|----------------------|--------------------------------|
| Mean age:               | 4 months          |                   |                   | 6 months          |                  |                  |                   | 12 months         |                    |                      |                                |
| <b>General</b>          |                   |                   |                   |                   |                  |                  |                   |                   |                    |                      |                                |
| wet/dry lung weight     |                   |                   |                   | 4.38<br>±0.33     |                  | 4.36<br>±0.16    | <i>ns</i>         | 4.59<br>±0.10     | 4.53<br>±0.10      | 4.55<br>±0.10        | <i>ns</i>                      |
| Body weight (g)         | 25.25<br>±4.87    | 22.28<br>±2.88    | <i>ns</i>         | 29.22<br>±6.41    | 28.90<br>±3.78   | 26.68<br>±3.81   | <i>ns</i>         | 34.43<br>±4.09    | 35.49<br>±6.16     | 34.53<br>±6.62       | <i>ns</i>                      |
| <b>Echocardiography</b> |                   |                   |                   |                   |                  |                  |                   |                   |                    |                      |                                |
| Heart rate (bpm)        | 432.50<br>±88.13  | 488.00<br>±27.20  | <i>ns</i>         | 420.42<br>±49.04  | 385.83<br>±36.43 | 455.00<br>±70.44 | <i>ns</i>         | 418.07<br>±46.23  | 428.77<br>±55.97   | 448.50<br>±63.77     | <i>ns</i>                      |
| <b>Right ventricle</b>  |                   |                   |                   |                   |                  |                  |                   |                   |                    |                      |                                |
| PAT/PET                 | 0.30<br>±0.03     | 0.23<br>±0.05     | 0.15              | 0.33<br>±0.04     | 0.29<br>±0.04    | 0.23<br>±0.06    | *                 | 0.34<br>±0.07     | 0.32<br>±0.05      | 0.31<br>±0.04        | <i>ns</i>                      |
| TV S'-Vel (mm/s)        | 39.29<br>±7.86    | 19.50<br>±1.01    | *                 | 25.14<br>±3.42    | 22.72<br>±5.46   | 21.96<br>±4.87   | <i>ns</i>         | 0.92<br>±0.15     | 23.82<br>±3.96     | 19.76<br>±6.65       | 0.11                           |
| wallthickness (mm)      | 0.27±0.09         | 0.27<br>±0.05     | <i>ns</i>         | 0.28<br>±0.04     | 0.26<br>±0.05    | 0.29<br>±0.08    | <i>ns</i>         | 0.28<br>±0.06     | 0.29<br>±0.06      | 0.31<br>±0.10        | <i>ns</i>                      |
| FAC (%)                 | 37.43<br>±9.44    | 17.48<br>±6.24    | *                 | 36.64<br>±11.41   | 31.89<br>±7.92   | 20.64<br>±7.26   | 0.15              | 37.49<br>±7.95    | 38.58<br>±7.81     | 28.02<br>±9.42       | 0.10                           |
| <b>Left ventricle</b>   |                   |                   |                   |                   |                  |                  |                   |                   |                    |                      |                                |
| LVAW;d (mm)             | 0.74<br>±0.10     | 0.72<br>±0.09     | <i>ns</i>         | 0.72<br>±0.11     | 0.77<br>±0.10    | 0.65<br>±0.19    | <i>ns</i>         | 0.82<br>±0.13     | 0.86<br>±0.13      | 0.81<br>±0.13        | <i>ns</i>                      |
| LVID;d (mm)             | 4.36<br>±0.30     | 4.32<br>±0.26     | <i>ns</i>         | 4.19<br>±0.38     | 4.08<br>±0.11    | 4.67<br>±0.52    | *                 | 4.27<br>±0.33     | 4.10<br>±0.30      | 4.04<br>±0.42        | <i>ns</i>                      |
| LVPW;d (mm)             | 0.75<br>±0.12     | 0.71<br>±0.12     | <i>ns</i>         | 0.73<br>±0.11     | 0.69<br>±0.07    | 0.70<br>±0.13    | <i>ns</i>         | 0.78<br>±0.09     | 0.82<br>±0.15      | 0.80<br>±0.12        | <i>ns</i>                      |
| LVAW;s (mm)             | 1.09<br>±0.08     | 0.97<br>±0.16     | <i>ns</i>         | 1.05<br>±0.18     | 1.15<br>±0.19    | 0.74<br>±0.25    | *                 | 1.16<br>±0.17     | 1.20<br>±0.19      | 1.18<br>±0.21        | <i>ns</i>                      |
| LVID;s (mm)             | 3.10<br>±0.25     | 3.26<br>±0.44     | <i>ns</i>         | 3.04<br>±0.51     | 2.89<br>±0.28    | 4.05<br>±0.56    | *                 | 3.10<br>±0.40     | 2.93<br>±0.31      | 2.79<br>±0.28        | <i>ns</i>                      |
| LVPW;s (mm)             | 1.11<br>±0.18     | 1.05<br>±0.17     | <i>ns</i>         | 1.07<br>±0.17     | 1.04<br>±0.12    | 0.92<br>±0.12    | 0.08              | 1.11<br>±0.14     | 1.17<br>±0.20      | 1.20<br>±0.20        | <i>ns</i>                      |
| FS (%)                  | 28.94<br>±3.49    | 24.83<br>±6.34    | <i>ns</i>         | 27.98<br>±6.15    | 29.19<br>±6.19   | 13.48<br>±5.11   | *                 | 27.52<br>±5.48    | 28.58<br>±4.15     | 30.16<br>±4.22       | <i>ns</i>                      |
| SV (μl)                 | 48.35<br>±7.37    | 38.74<br>±3.85    | <i>ns</i>         | 40.60<br>±5.73    | 40.63<br>±4.81   | 28.43<br>±11.05  | *                 | 44.25<br>±9.08    | 41.51<br>±7.49     | 41.36<br>±9.91       | <i>ns</i>                      |
| Output (ml/min)         | 21.00<br>±5.43    | 18.92<br>±2.32    | <i>ns</i>         | 16.99<br>±2.53    | 15.75<br>±2.98   | 12.61<br>±3.99   | *                 | 18.48<br>±4.37    | 17.74<br>±3.82     | 18.53<br>±4.82       | <i>ns</i>                      |
| MV A-Vel (mm/s)         | 469.34<br>±152.33 | 268.79<br>±101.26 | *                 | 408.56<br>±105.75 | 336.92<br>±85.23 | 165.00<br>±90.18 | *                 | 423.37<br>±128.18 | 367.8<br>±91.59    | 418.3<br>±90.78      | <i>ns</i>                      |
| MV E-Vel (mm/s)         | 760.10<br>±136.72 | 628.19<br>±222.32 | <i>ns</i>         | 600.81<br>±145.35 | 570.44<br>±86.71 | 532.94<br>±72.21 | <i>ns</i>         | 608.62<br>±111.32 | 576.02<br>±127.21  | 573.78<br>±63.13     | <i>ns</i>                      |
| Tei-index               | 0.41<br>±0.08     | 0.43<br>±0.09     | <i>ns</i>         | 0.65<br>±0.12     | 0.47<br>±0.07    | 0.60<br>±0.28    | <i>ns</i>         | 0.49<br>±0.16     | 0.53<br>±0.14      | 0.44<br>±0.07        | <i>ns</i>                      |
| MV E/A                  | 1.68<br>±0.31     | 2.48<br>±1.13     | <i>ns</i>         | 1.50<br>±0.31     | 1.74<br>±0.25    | 4.14<br>±2.25    | 0.15              | 1.54<br>±0.46     | 1.69<br>±0.67      | 1.40<br>±0.13        | <i>ns</i>                      |
| MV E/E'                 | -40.68<br>±14.69  | -38.37<br>±5.12   | <i>ns</i>         | -36.74<br>±4.66   | -32.92<br>±3.80  | -39.33<br>±15.56 | <i>ns</i>         | -38.99<br>±7.97   | -35.93<br>±9.84    | -45.30<br>±10.46     | <i>ns</i>                      |
| LV mass/BW (mg/g)       | 3.96<br>±0.37     | 4.19<br>±0.68     | <i>ns</i>         | 3.12<br>±0.64     | 2.98<br>±0.24    | 3.78<br>±1.18    | <i>ns</i>         | 3.10<br>±0.67     | 3.02<br>±0.72      | 2.84<br>±0.54        | <i>ns</i>                      |
| <b>ECG</b>              |                   |                   |                   |                   |                  |                  |                   |                   |                    |                      |                                |
| Heart rate (bpm)        | 471.5<br>±46.89   | 514.1<br>±27.97   | <i>ns</i>         | 420.8<br>±38.55   | 413<br>±30.21    | 470.5<br>±75.79  | 0.09              | 433.5<br>±48.15   | 454.4<br>±65.94    | 458.7<br>±31.21      | <i>ns</i>                      |
| PR interval (ms)        | 39.47<br>±0.62    | 42.69<br>±5.63    | <i>ns</i>         | 43.64<br>±3.20    | 41.94<br>±1.55   | 43.3<br>±6.62    | <i>ns</i>         | 42.55<br>±4.55    | 42.75<br>±3.48     | 41.24<br>±1.07       | <i>ns</i>                      |
| P amplitude (mV)        | 0.112<br>±0.029   | 0.058<br>±0.092   | *                 | 0.089<br>±0.023   | 0.109<br>±0.031  | 0.068<br>±0.017  | <i>ns</i>         | 0.102<br>±0.017   | 0.091<br>±0.020    | 0.095<br>±0.023      | <i>ns</i>                      |
| Q amplitude (mV)        | 0.008<br>±0.005   | -0.018<br>±0.026  | *                 | 0.010<br>±0.010   | 0.004<br>±0.015  | -0.012<br>±0.025 | *                 | 0.012<br>±0.005   | 0.013<br>±0.014    | 0.012<br>±0.011      | <i>ns</i>                      |
| R amplitude (mV)        | 1.18<br>±0.03     | 0.83<br>±0.29     | 0.06              | 0.81<br>±0.22     | 0.78<br>±0.10    | 0.65<br>±0.26    | 0.2               | 0.73<br>±0.18     | 0.69<br>±0.23      | 0.58<br>±0.07        | <i>ns</i>                      |

606 **Supplementary Table 1. Detailed analysis of the cardiac phenotype in DSG2-W2A**  
607 **mice.** Presented data correspond to echocardiography and ECG measurements in  
608 Figure 2 and include the same animals. Values indicate the mean  $\pm$  standard deviation.  
609 For statistical comparison of all groups, distribution of data was analysed by Shapiro-  
610 Wilk normality test and group variance was analysed by Brown-Forsythe test.  
611 According to the results the respective test was applied: one-way ANOVA with Sidak's  
612 post hoc test for normal distributed data with similar variance, Welch's ANOVA for  
613 normal distributed data with different variance and Kruskal-Wallis test with Dunn's post  
614 hoc test for non-normal distributed data. Grey rows show the respective P values for  
615 the indicated comparisons with \* $P < 0.05$  and *ns* $P > 0.2$ . See detailed Methods section  
616 for abbreviations and calculation of parameters.

| Category                                              | mut/wt                                                                                        | mut/mut                                                                                                         |
|-------------------------------------------------------|-----------------------------------------------------------------------------------------------|-----------------------------------------------------------------------------------------------------------------|
| <b>I. Morpho-functional ventricular abnormalities</b> | <i>Echocardiography:</i><br><b>RV systolic dysfunction</b> (RV FS) in hearts with RV fibrosis | <i>Echocardiography:</i><br><b>RV and LV systolic dysfunction</b> (TAPSE, RV FS, LV EF)                         |
| <b>II. Structural myocardial abnormalities</b>        | <i>Histology:</i><br><b>RV fibrosis</b> occurring in 36% of mice age > 40 weeks               | <i>Histology:</i><br><b>RV and LV fibrosis</b>                                                                  |
| <b>III. Repolarization abnormalities</b>              | <i>ECG:</i><br>Tendency to reduced J amplitude                                                | <i>ECG:</i><br>Altered early repolarization with reduced <b>J amplitude</b>                                     |
| <b>IV. Depolarization abnormalities</b>               | <i>ECG:</i><br>Reduction of <b>S amplitude</b>                                                | <i>ECG:</i><br>Elongation of <b>QRS interval</b> , reduction of <b>S amplitude</b>                              |
| <b>V. Ventricular arrhythmias</b>                     | <i>ECG:</i><br>Frequent <b>PVCs</b> in 78% of male mice with RV fibrosis                      | <i>ECG:</i><br>Frequent <b>PVCs</b> in 56% of mice, one mouse with <b>non-sustained ventricular tachycardia</b> |
| <b>VI. Genetics</b>                                   | <b>Likely pathogenic mutation</b> in desmosomal molecule                                      | <b>Likely pathogenic mutation</b> in desmosomal molecule<br><br>Premature <b>sudden death</b>                   |

617 **Supplementary Table 2. Comparison of the cardiac alterations in the DSG2-W2A**  
618 **mouse model to ACM diagnosis criteria applied in patients.** Summary of data  
619 presented in Figure 2 and Supplementary Table 1. Categorization according to the  
620 Padua ACM diagnosis criteria.<sup>13</sup>

| <b>Gene name</b> | <b>Primer name</b> | <b>Sequence (5'→3')</b> | <b>Product size</b> |
|------------------|--------------------|-------------------------|---------------------|
| <i>Col1a1</i>    | qPCR_mCol1a1_for   | CCCAGCCGCAAAGAGTCTAC    | 152                 |
| <i>Col1a1</i>    | qPCR_mCol1a1_rev   | GGACCCTTAGGCCATTGTGT    |                     |
| <i>Lamc2</i>     | qPCR_mLamc2_for    | GTGCCGGAGTTACCATCCAA    | 162                 |
| <i>Lamc2</i>     | qPCR_mLamc2_rev    | CAGACATCAAGGGCCGAAGT    |                     |
| <i>Fn1</i>       | qPCR_mFn1_for      | CTGGATCCCCTCCCAGAGAA    | 193                 |
| <i>Fn1</i>       | qPCR_mFn1_rev      | TTGGGGTGTGGAAGGGTAAC    |                     |
| <i>Timp1</i>     | qPCR_mTimp1_for    | AGATACCATGATGGCCCCCT    | 176                 |
| <i>Timp1</i>     | qPCR_mTimp1_rev    | TGGTCTCGTTGATTTCTGGGG   |                     |
| <i>Id2</i>       | qPCR_mId2_for      | ACATCAGCATCCTGTCCTTGC   | 200                 |
| <i>Id2</i>       | qPCR_mId2_rev      | ACGTGTTCTCCTGGTCAAATGG  |                     |
| <i>Col3a1</i>    | qPCR_mCol3a1_for   | CCAGTGGCCATAATGGGGAA    | 122                 |
| <i>Col3a1</i>    | qPCR_mCol3a1_rev   | ATCTCGACCTGGCTGACCAT    |                     |
| <i>Col1a2</i>    | qPCR_mCol1a2_for   | TGGATACGCGGACTCTGTTG    | 87                  |
| <i>Col1a2</i>    | qPCR_mCol1a2_rev   | GGCCTTTTCGTACTGATCCC    |                     |
| <i>Itgb6</i>     | qPCR_mItgb6_for    | TGGCACTTCTGCCAAAGACT    | 150                 |
| <i>Itgb6</i>     | qPCR_mItgb6_rev    | TTTCTGTCTGGGCTCACGTC    |                     |
| <i>Tubg2</i>     | qPCR_mTubg2_for    | GGTCTGGGCTCCTACCTCTTA   | 96                  |
| <i>Tubg2</i>     | qPCR_mTubg2_rev    | ACTCATCTCGTCCTGGTTGG    |                     |
| <i>Gapdh</i>     | qPCR_mGapdh_for    | CCCACTCTTCCACCTTCGAT    | 199                 |
| <i>Gapdh</i>     | qPCR_mGapdh_rev    | AGTTGGGATAGGGCCTCTCTT   |                     |

621 **Supplementary Table 3. Primers used in qRT-PCR experiments.**
